# Supplementary material for: Surface Modulation of 3D Porous CoNiP Nanoarrays In Situ Grown on Nickel Foams for Robust Overall Water Splitting
Source: MDPI journal article supplement (doi:10.3390/ijms23105290), 2022-05-10
Supplement: s1 [file s1]

# Surface Modulation of 3D Porous CoNiP Nanoarrays In Situ Grown on Nickel Foams for Robust Overall Water Splitting

Jianpeng Li <sup>1,†</sup>, Caiyan Gao <sup>2,†</sup>, Haiyang Wang <sup>1</sup>, Baojun Li <sup>1</sup>, Shufang Zhao <sup>3</sup>, Young Dok Kim <sup>3</sup>, Zhongyi Liu <sup>1</sup>, Xin Du <sup>1,\*</sup> and Zhikun Peng <sup>1</sup>

<sup>1</sup> College of Chemistry, Research Center of Green Catalysis, Henan Institute of Advance Technology, Zhengzhou University, Zhengzhou 450001, China; lijianpeng@gs.zzu.edu.cn (J.L.); 18037897076@163.com (H.W.); lbjfc@zzu.edu.cn (B.L.); zhongyiliu@zzu.edu.cn (Z.L.); pengzhikun@zzu.edu.cn (Z.P.)

<sup>2</sup> School of Resources and Environmental Engineering, Wuhan University of Technology, Wuhan 430070, China; 17803897978@163.com

<sup>3</sup> Department of Chemistry, Sungkyunkwan University, Suwon 16419, Korea; taylorbjt096-@naver.com (S.Z.); ydkim91@skku.edu (Y.D.K.)

\* Correspondence: duxin\_1911@163.com (X.D.)

† These authors contributed equally to this work..

## Density Functional Theory Simulation

The first-principles density functional theory (DFT) calculations was performed via Vienna abinitio simulation package (VASP) from the website (<https://www.materialsproject.org/materials/mp-990448/#>),

In order to obtain the accurate electronic structures and free energy, The calculations were performed using the hybrid functional as proposed by PBE interactions are represented using the projector augmented wave (PAW) potential, and the Kohn-Sham one-electron valence states were expanded on the basis of plane waves with a cutoff energy of 400 eV. The Hellmann-Feynman forces convergence criterion was set as less than 0.05 eV Å<sup>-1</sup>, The K-point of 3×3×1 was used for the optimization of the surface of Co<sub>2</sub>P, Ni<sub>2</sub>P and CoNiP (001) and the atomic layer with the thicknesses about 3.0-15.0 Å is anchored.

The zero point energy (ZPE) correction was performed referring to the approaches previously reported. In the DFT process, we calculated the Gibbs free energy according to the equations as follow:

$$G^0 = E_{DFT} + ZPE - TS^0$$

Where  $G^0$  is the Gibbs free energy,  $E_{DFT}$  is total free energy,  $ZPE$  is the vibration energy;  $TS^0$  is the entropy change (T = 298.15 K).

The OER was contained of four-electron transfer half-reaction in electrocatalytic water splitting, thereby, the total free energy was obtained from the following formulas:

$$\Delta G = \Delta G_1 + \Delta G_2 + \Delta G_3 + \Delta G_4$$

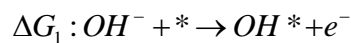

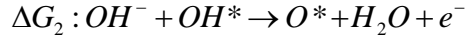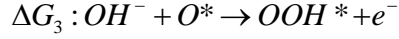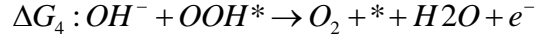

Where  $\Delta G$  is the total free energy;  $\Delta G_1$  is the absorption energy of first electron transfer reaction;  $\Delta G_2$  is the absorption energy of second electron transfer reaction;  $\Delta G_3$  is the absorption energy of third electron transfer reaction;  $\Delta G_4$  is the absorption energy of fourth electron transfer reaction.

In addition, the adsorption energies of intermediates ( $^*OH$  and  $^*OOH$ ) were calculated by the following formulas:

$$\eta^{OER} = (G^{OER} / e) - 1.23V$$

Where  $\eta^{OER}$  is the overpotential,  $G^{OER}$  is the max value among (  $\Delta G_1$  ,  $\Delta G_2$  ,  $\Delta G_3$  ,  $\Delta G_4$  ).

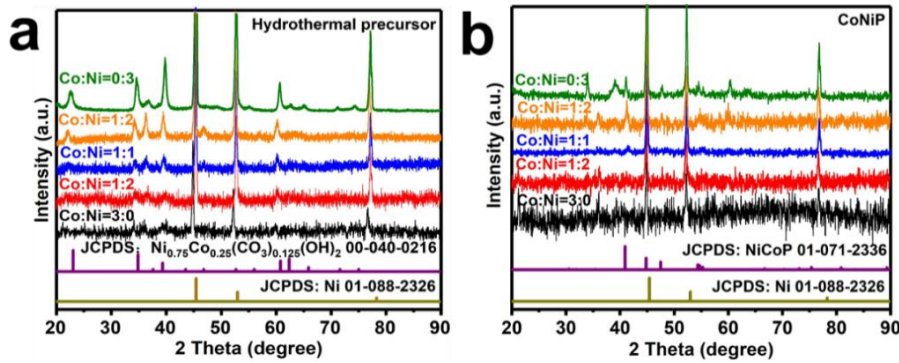

**Figure S1.** XRD patterns of (a) CoNi-hydroxides NA/NF and (b) CoNiP NA/NF with different Co/Ni ratios.

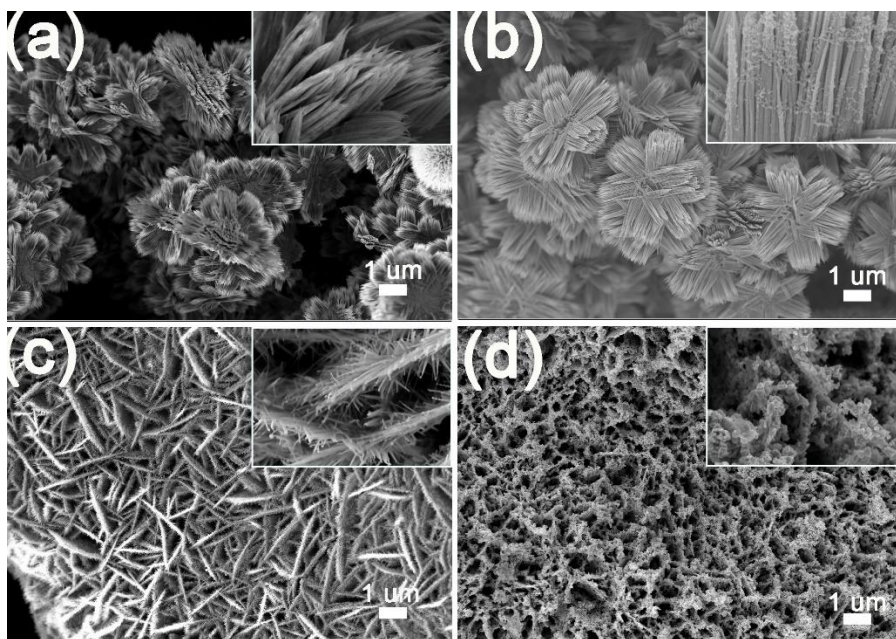

**Figure S2.** SEM images of (a) Co<sub>2</sub>P NA/NF, (b) CoNiP NA/NF-1, (c) CoNiP NA/NF-3 and (d) Ni<sub>2</sub>P NA/NF

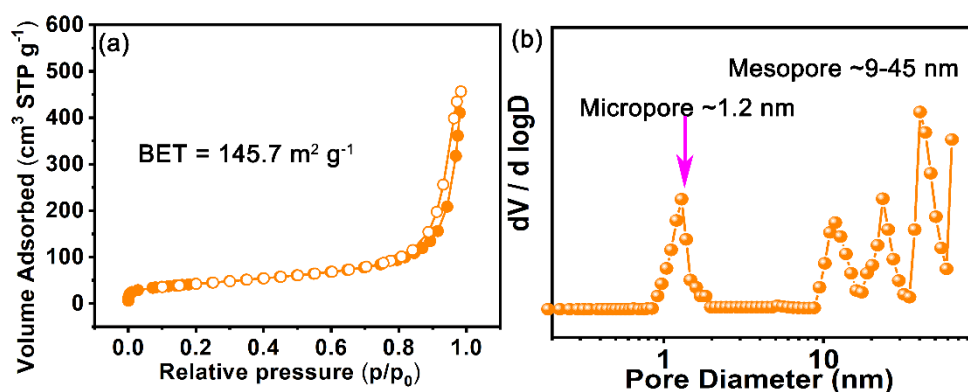

**Figure S3** (a) Nitrogen adsorption-desorption isotherms and (b) corresponding pore size distribution of CoNiP NA/NF-2

**Table S1.** The comparison of HER performance of the samples in 1 M KOH solution.

| Catalysts                  | Current density (mA/cm <sup>2</sup> ) | Overpotential | Ref                                      |
|----------------------------|---------------------------------------|---------------|------------------------------------------|
| CoP-MNA/NF                 | 10                                    | 189           |                                          |
| Ni                         | 10                                    | 400           | ACS Catal. 2013, 3, 166                  |
| CoP/CC                     | 10                                    | 209           | J. Am. Chem. Soc. 2014, 136, 7587        |
| Co <sub>2</sub> P nanorods | 10                                    | 171           | Nano Energy 2014, 9, 373                 |
| Fe-CoP                     | 10                                    | 190           | Adv. Sci., 2018, 5, 1800949.             |
| CoFePBA@CoP                | 10                                    | 171           | Small Methods, 2021, 5.                  |
| CoMnP/Ni <sub>2</sub> P    | 10                                    | 209           | J. Mater. Chem. A, 2021, 9, 22129-22139. |

|                                     |    |     |                                             |
|-------------------------------------|----|-----|---------------------------------------------|
| Ni <sub>2</sub> P-Fe <sub>2</sub> P | 10 | 261 | J. Mater. Chem. A, 2021, 9,<br>22129-22139. |
| CoNiP NA/NF                         | 10 | 162 | <b>This works</b>                           |

**Table S2.** Comparison of cell potentials at a current density of 10 mA cm<sup>-2</sup> for TMPs-based bifunctional electrocatalysts toward overall water splitting

| Catalysts                             | Cell potential (V) | Ref                                              |
|---------------------------------------|--------------------|--------------------------------------------------|
| Ni <sub>5</sub> P <sub>4</sub> film   | 1.7                | Angew. Chem. Int. Ed. 2015, 54, 12361–12365      |
| CoNiP/rGO                             | 1.59               | Adv. Funct. Mater. 2016, 26, 6785 6796           |
| CoNiP                                 | 1.57               | Adv. Funct. Mater. 2016, 26, 7644 7651           |
| NiFeP                                 | 1.65               | Adv. Energy Mater. 2017, 7, 1700107              |
| CoNiP                                 | 1.64               | Adv. Mater. Interfaces 2016, 3, 1500454          |
| NiFeP                                 | 1.67               | ACS Appl. Mater. Interfaces 2017, 9, 26134 26142 |
| Ni <sub>1.5</sub> Fe <sub>0.5</sub> P | 1.59               | Nano Energy 2017, 34, 472 480                    |
| Ni <sub>1-x</sub> Co <sub>x</sub> P   | 1.59               | Nanoscale 2016, 8, 19129 19138                   |
| CoNiP NA/NF                           | 1.613              | <b>This works</b>                                |

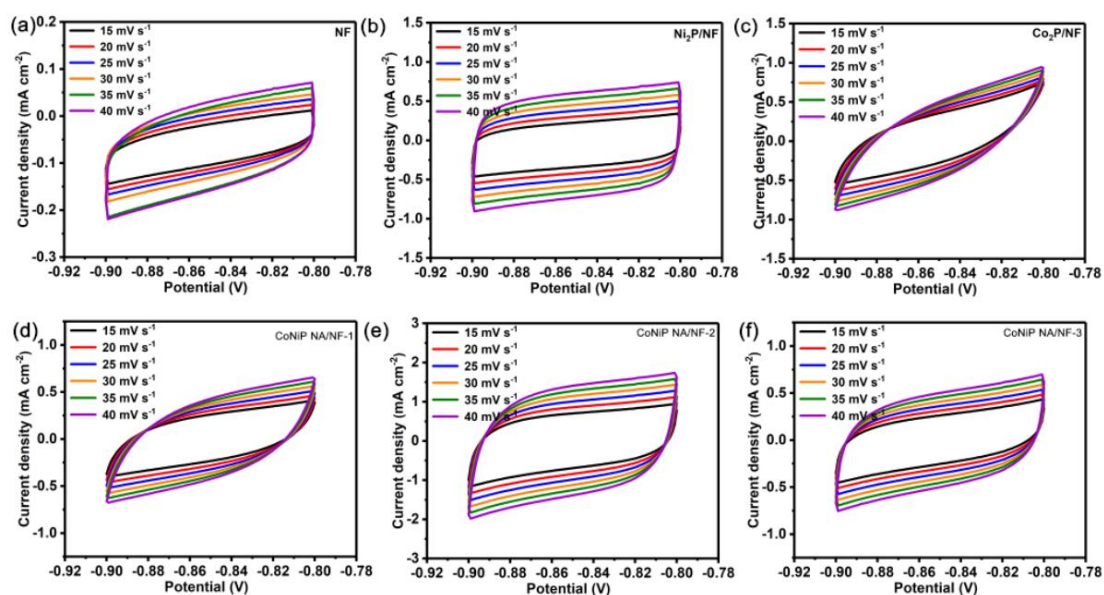

**Figure S4.** (a-f) CV curves measured for HER with scan rate from 15 to 40 mV s<sup>-1</sup> for various samples.

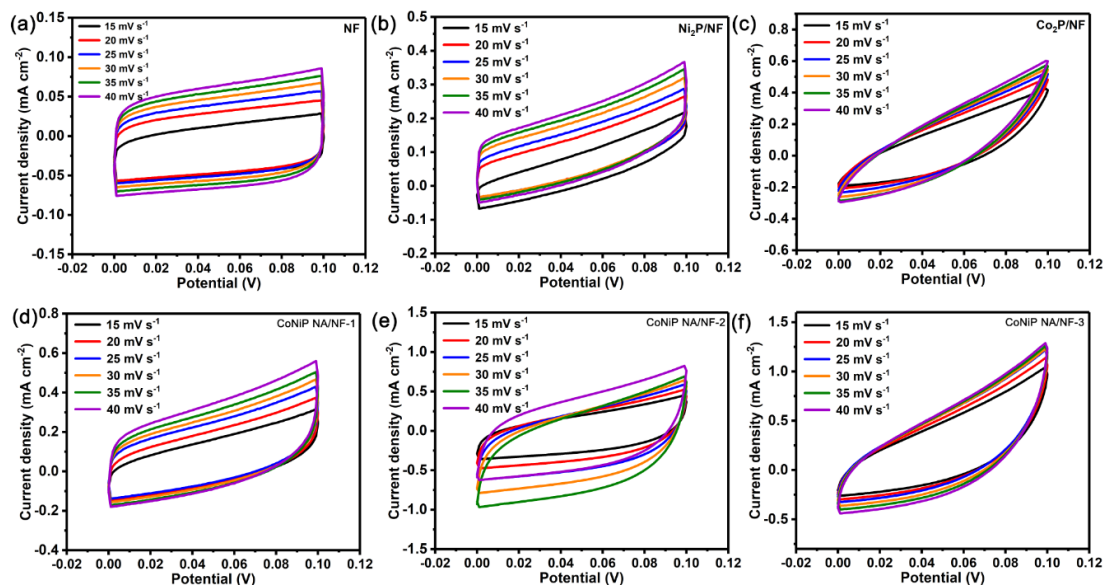

**Figure S5.** (a-f) CV curves measured for OER with scan rate from 15 to 40  $\text{mV s}^{-1}$  for various samples.

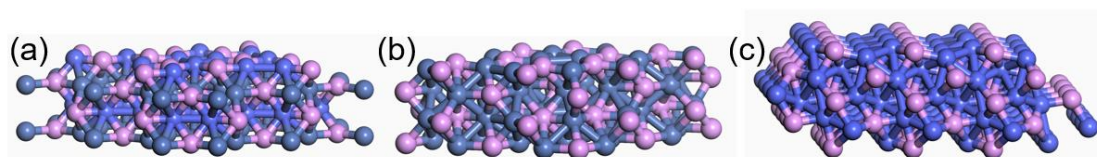

**Figure S6** Crystal structure model. (a) CoNiP, (b) Ni<sub>2</sub>P, and (c) Co<sub>2</sub>P.

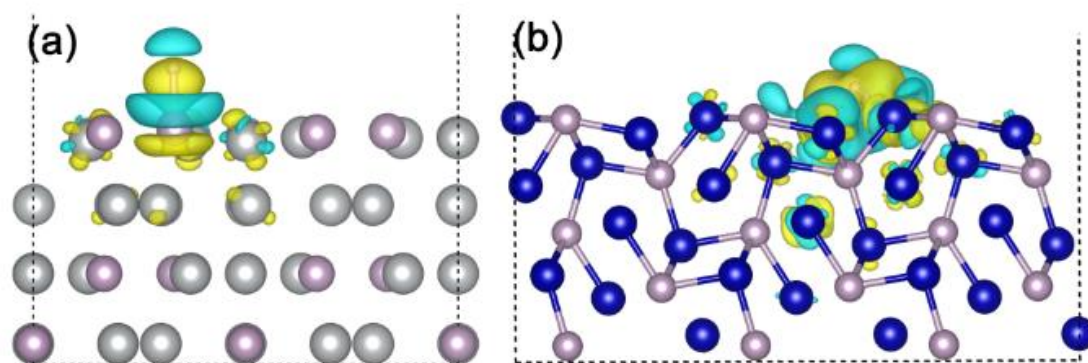

**Figure S7** Charge density difference plots at the surface of CoNiP (a) Ni<sub>2</sub>P, (b) Co<sub>2</sub>P for HER.



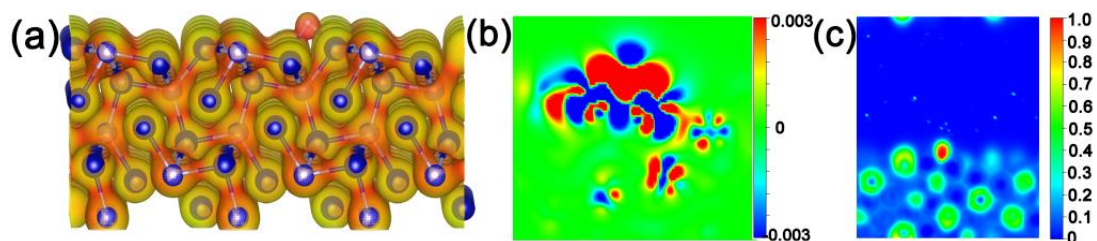

**Figure S8** Electrostatic potential distribution after adsorption of H\* on the (a) Co<sub>2</sub>P surface. The corresponding cross section of charge density difference of (b) Co<sub>2</sub>P. The corresponding electron localization function (ELF) of (c) Co<sub>2</sub>P.

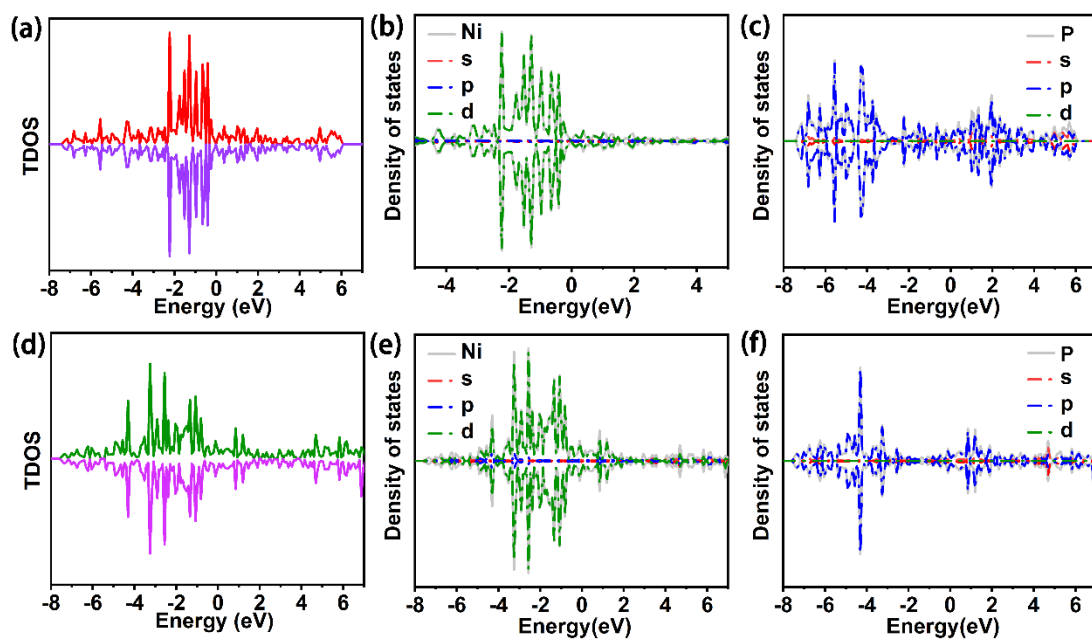

**Figure S9** Calculated total and partial electronic density of states for (a-c) CoNiP, and (d-e) Ni<sub>2</sub>P.
